# Supplementary material
Source: PubMed Central journal article supplement (PMC6389417)
Supplement: NIHMS1518657-supplement-Supplemental_Publication_Material.pdf [file NIHMS1518657-supplement-Supplemental_Publication_Material.pdf]

## Supplemental Material

|                                                                                      |    |
|--------------------------------------------------------------------------------------|----|
| ATTRACT Study Leadership and Investigators .....                                     | 2  |
| Table S1: Binary Study Outcomes by Treatment Group (Per-Protocol Analysis).....      | 8  |
| Table S2: Continuous Study Outcomes by Treatment Group (Per-Protocol Analysis) ..... | 9  |
| Details of Growth Curve Modelling of the Villalta Scores .....                       | 10 |

## ATTRACT Study Leadership and Investigators

### Steering Committee

|                                                        |                                             |
|--------------------------------------------------------|---------------------------------------------|
| Samuel Z. Goldhaber, MD ( <b>Chair</b> )               | Harvard Medical School                      |
| David J. Cohen, MD, MSc                                | St. Luke's Mid America Heart Institute      |
| Anthony J. Comerota, MD                                | University of Michigan                      |
| Heather L. Gornik, MD, MHS, RVT                        | Cleveland Clinic Heart & Vascular Institute |
| Michael R. Jaff, DO                                    | Harvard Medical School                      |
| Jim Julian, MMath                                      | McMaster University                         |
| Susan R. Kahn, MD, MSc                                 | McGill University, Jewish General Hospital  |
| Clive Kearon, MB, PhD                                  | McMaster University                         |
| Stephen Kee, MD (SIR Foundation)                       | UCLA Medical Center                         |
| Andrei L. Kindzelski, MD, PhD                          | National Heart, Lung, and Blood Institute   |
| Lawrence Lewis, MD                                     | Washington University in St. Louis          |
| Elizabeth Magnuson, ScD                                | St. Luke's Mid America Heart Institute      |
| Mahmood K. Razavi, MD                                  | St. Joseph's Vascular Institute             |
| Timothy P. Murphy, MD                                  | Brown University                            |
| Suresh Vedantham, MD ( <b>Principal Investigator</b> ) | Washington University in St. Louis          |

### Clinical Coordinating Center

Mallinckrodt Institute of Radiology, Washington University in St. Louis, United States

### Data Coordinating Center

Ontario Clinical Oncology Group, McMaster University, Hamilton, Canada

### Health Economic Core Laboratory

Mid America Heart Institute, St. Luke's Hospital, Kansas City, United States

### Vascular Ultrasound Core Laboratory

VasCore, Massachusetts General Hospital, Boston, United States

## ATTRACT Clinical Centers: Site Investigators

**Adventist Midwest Health:** Michael Sichlau – site PI, Athanasios Vlahos, Steven Smith, Quinn Thalheimer, Nisha Singh, Rekha Harting, John Gocke, Scott Guth, Neel Shah

**Albert Einstein Medical Center:** Paul Brady – site PI, Marvin Schatz, Mindy Horrow, Peyman Markazi, Leli Forouzan, Terence A.S. Matalon, David Hertzog

**Allegheny General Hospital:** Swapna Goday – site PI, Margaret Kennedy – previous site PI, Robert Kaplan, Thomas Campbell, Jamie Hartman, Elmer Nahum, Arvind Venkat

**Ann Arbor VA Health Center:** Venkataramu Krishnamurthy – site PI, John Rectenwald, Peter Henke, Jonathan Eliason, Jonathon Willatt, Guillermo Escobar

**Baptist Cardiac and Vascular Institute:** Shaun Samuels – site PI, Barry Katzen, James Benenati, Alex Powell, Constantino Pena, Howard Wallach, Ripal Gandhi

**Central DuPage Hospital:** Joseph Schneider – site PI, Stanley Kim, Farrah Hashemi, Joseph Boyle, Nilesh Patel, Michael Verta

**Christiana Care Hospital:** Daniel Leung – site PI, Marc Garcia – previous site PI, Phillip Blatt, Jamil Khatri, Dave Epstein, Randall Ryan, Tom Sweeny, Michael Stillabower, George Kimbiris, Tuhina Raman, Paul Sierzenski, Lelia Getto, Michael Dignazio, Paul Sierzenski, Mark Horvath

**Cleveland Clinic Foundation:** Heather Gornik – site PI, John Bartholomew, Mehdi Shishehbor, Frank Peacock, Douglas Joseph, Soo Hyum Kim, Natalia Fendrikova-Mahlay, Daniel Clair, Sean Lyden, Baljendra Kapoor, Gordon McLennon, Gregory Pierce, James Newman, James Spain, Amanjiit Gill, Aaron Hamilton, Anthony Rizzo, Woosup Park

**Danbury Hospital:** Alan Dietzek – site PI, Ira Galin, Dahlia Plummer, Richard Hsu, Patrick Broderick, Andrew Keller, Sameer Sayeed

**Eastern Connecticut Hematology & Oncology Associates:** Dennis Slater – site PI, Herb Lustberg, Jan Akus, Robert Sidman, Mandeep Dhani, Phillip Kohanski, Anca Bulgaru, Renuka Dulala, James Burch, Dinesh Kapur, Jie Yang

**Florida Hospital:** Mark Ranson – site PI, Alan Wladis, David Varnagy, Tarek Mekhail, Robert Winter, Manuel Perez-Izquierdo

**Forsyth Medical Center:** Stephen Motew – site PI, Robin Royd-Kranis, Raymond Workman, Scott Kribbs, Gerald Hogsette, Phillip Moore, Bradley Thomason, William Means, Richard Bonsall, John Stewart, Daniel Golwya

**Gundersen Clinic, Ltd.:** Ezana Azene – site PI, Wayne Bottner, William Bishop, Dave Clayton, Lincoln Gundersen, Jody Riherd, Irina Shakhnovich, Kurt Ziegelbein

**Georgetown University:** Thomas Chang – site PI, Karun Sharma – previous site PI, Sandra Allison, Fil Banovac, Emil Cohen, Brendan Furlong, Craig Kessler, Mike McCullough, Jim Spies

**Henry Ford Health System:** Judith Lin – site PI, Scott Kaatz, Todd Getzen, Joseph Miller, Scott Schwartz, Loay Kabbani, David McVinnie

**Holy Name Medical Center:** John Rundback – site PI, Joseph Manno, Richard Schwab, Randolph Cole, Kevin Herman, David Singh, Ravit Barkama, Amish Patel

**Jobst Vascular Center:** Anthony Comerota – site PI, John Pigott, Andrew Seiwert, Ralph Whalen, Todd Russell, Zakaria Assi, Sahira Kazanjian, Jonathan Yobbagy, Brian Kaminski, Allan Kaufman, Garrett Begeman, Robert DiSalle, Subash Thakur

**Maine Medical Center:** Paul Kim – site PI, Marc Jacquet, Thomas Dykes, Joseph Gerding, Christopher Baker, Mark Debiasto, Derek Mittleider, George Higgins III, Steven Amberson, Roger Pezzuti, Thomas Gallagher PA-C

**Massachusetts General Hospital:** Robert Schainfeld – site PI, Stephan Wicky – previous site PI, Sanjeeva Kalva, Gregory Walker, Gloria Salazar, Benjamin Pomerantz, Virenda Patel, Christopher Kabrhel, Shams Iqbal, Suvrana Gangull, Rahmi Oklu, Scott Brannan

**Mayo Clinic:** Sanjay Misra – site PI, Haraldur Bjarnason – previous site PI, Aneel Ashrani, Michael Caccavale, Chad Fleming, Jeremy Friese, John Heit, Manju Kalra, Thanila Macedo, Robert McBane, Michael McKusick, Andrew Stockland, David Woodrum, Waldemar Wysokinski

**Mease Countyside Hospital:** Adarsh Verma – site PI, Andrew Davis – previous site PI, Jerry Chung, David Nicker, Brian Anderson, Robert Stein, Michael Weiss

**Medical College of Wisconsin/Froedtert Hospital & Clinics:** Parag Patel – site PI, William Rilling, Sean Tutton, Robert Hieb, Eric Hohenwalter, M. Riccardo Colella, James Gosset, Sarah White, Brian Lewis, Kellie Brown, Peter Rossi, Gary Seabrook

**Medical University of South Carolina:** Marcelo Guimaraes – site PI, J. Bayne Selby, William McGary, Christopher Hannegan, Jacob Robison, Thomas Brothers, Bruce Elliott, Nitin Garg, M. Bret Anderson, Renan Uflacker, Claudio Schonholz, Laurence Raney, Charles Greenberg

**Oregon Health & Science University:** John Kaufman – site PI, Frederick Keller, Kenneth Kolbeck, Gregory Landry, Erica Mitchell, Robert Barton, Thomas DeLoughery, Norman Kalbfleisch, Renee Minjarez, Paul Lakin, Timothy Liem, Gregory Moneta, Khashayar Farsad, Ross Fleischman, Loren French

**Pepin Heart Hospital and Dr. Kiran C. Patel Research Institute:** Vasco Marques – site PI, Yasir Al-Hassani, Asad Sawar, Frank Taylor

**Phoenix Heart & Cardiovascular:** Rajul Patel – site PI, Rahul Malhotra – previous site PI, Stanley Kim, Farah Hashemi, Joseph Boyle, Nilesh Patel, Marvin Padnick, Melissa

Gurley, Fred Cucher, Ronald Sterrenberg, G. Reshmaal Deepthi, Gomes  
Cumaranatunge

**Riverside Methodist Hospital:** Sumit Bhatla – site PI, Darick Jacobs, Eric Dolen, Pablo Gamboa, L. Mark Dean, Thomas Davis, John Lippert, Sanjeev Khanna, Brian Schirf, Jeffrey Silber, Donald Wood, J. Kevin McGraw, Lucy LaPerna, Paul Willette

**Rhode Island Hospital:** Timothy Murphy – site PI, Joselyn Cerezo, Rajoo Dhangana, Sun Ho Ahn, Gregory Dubel, Richard Haas, Bryan Jay, Ethan Prince, Gregory Soares, James Klinger, Robert Lambiase, Gregory Jay, Robert Tubbs, Michael Beland, Chris Hampson, Ryan O'Hara, Chad Thompson, Michael Beland, Aaron Frodsham, Fenwick Gardiner, Abdel Jaffan, Lawrence Keating, Abdul Zafar

**Providence Sacred Heart Medical Center & Children's Hospital:** Radica Alicic – site PI, Rodney Raabe – previous site PI, Jayson Brower, David McClellan, Thomas Pellow, Christopher Zylak, Joseph Davis, M. Kathleen Reilly, Kenneth Symington, Camerson Seibold, Ryan Nachreiner, Daniel Murray, Stephen Murray, Sandeep Saha, Gregory Luna

**Southern Illinois University:** Kim Hodgson – site PI, Robert McLafferty – previous site PI, Douglas Hood, Colleen Moore, David Griffen

**St. Elizabeth Healthcare Edgewood (KY):** Darren Hurst – site PI, David Lubbers, Daniel Kim, Brent Warren, Jeremy Engel, D. P. Suresh

**St. Elizabeth Regional Medical Center (NE):** Eric VanderWoude – site co-PI, Rahul Razdan – site co-PI, Mark Hutchins, Terry Rounsborg, Madhu Midathada, Daniel Moravec, Joni Tilford, Daniel Kim, Joni Beckman PA

**St. Joseph Hospital:** Mahmood Razavi – site PI, Kurt Openshaw, D. Preston Flanigan, Christopher Loh, Howard Dorne, Michael Chan

**St. Luke's Hospital and Health Network:** Jamie Thomas – site PI, Justin Psaila, Michael Ringold, Jay Fisher, Any Lipcomb, Timothy Oskin

**St. Luke's Hospital:** Brandt Wible – site PI, Brendan Coleman, David Elliott, Gary Gaddis, C. Doug Cochran

**St. Vincent Medical Group:** Kannan Natarajan – site PI, Stewart Bick, Jeffrey Cooke, Ann Hedderman, Anne Greist, Lorrie Miller, Brandon Martinez, Vincent Flanders, Mark Underhill

**Stanford University Medical Center:** Lawrence Hofmann – site PI, Daniel Sze, William Kuo, John Louie, Gloria Hwang, David Hovsepian, Nishita Kothary, Caroline Berube, Donald Schreiber, Brooke Jeffrey

**Staten Island University Hospital:** Jonathan Schor – site PI, Jonathan Deitch, Kuldeep Singh, Barry Hahn, Brahim Ardolic, Shilip Gupta

**Temple University Hospital:** Riyaz Bashir – site PI, Angara Koneti Rao, Manish Garg, Pravin Patil, Chad Zack, Gary Cohen, Frank Schmieder, Valdimir Lakhter

**The Reading Hospital:** David Sacks – site PI, Robert Guay, Mark Scott, Karekin Cunningham, Adam Sigal, Terrence Cescon, Nick Leasure, Thiruvenkatasamy Dhurairaj

**TriHealth/Good Samaritan Hospital:** Patrick Muck – site PI, Kurt Knochel, Joann Lohr, Jose Barreau, Matthew Recht, Jayapandia Bhaskaran, Ranga Brahmamdam, David Draper, Apurva Mehta, James Maher

**University of Iowa:** Melhem Sharafuddin – site PI, Steven Lentz, Andrew Nugent, William Sharp, Timothy Kresowik, Rachel Nicholson, Shiliang Sun, Fadi Youness, Luigi Pascarella

**University of Illinois- Chicago:** Charles Ray – site PI, Martha-Gracia Knuttinen – previous site PI, James Bui, Ron Gaba, Valerie Dobiesz, Ejaz Shamim, Sangeetha Nimmagadda, David Peace, Aarti Zain, Alison Palumto

**University of Maryland:** Ziv Haskal – site PI, Jon Mark Hirshon, Howard Richard, Avelino Verceles, Jade Wong-You-Chong, Bertrand Othee, Rahul Patel, Bogdan Iliescu

**University of Michigan Hospitals and Health Centers:** David Williams – site PI, Joseph Gemmete, Venkataramu Krishnamurthy, Wojciech Cwikiel, Kyung Cho, James Shields, Ranjith Vellody, Paula Novelli, Narasimham Dasika, Thomas Wakefield, John Rectenwald, Peter Henke, Jeffrey Desmond, James Froehlich, Minhajuddin Khaja

**University of Minnesota:** David Hunter – site PI, Jafar Golzarian, Erik Cressman, Yvonne Dotta, Nate Schmiechen

**University of New Mexico:** John Marek – site PI, David Garcia, Isaac Tawil, Mark Langsfeld

**University of North Carolina:** Stephan Moll – site PI, Matthew Mauro, Joseph Stavas, Charles Burke, Robert Dixon, Hyeon Yu, Blair Keagy, Kyuny Kim, Raj Kasthuri, Nigel Key

**University of Pittsburgh:** Rabih Chaer – site PI, Michael Makaroun, Robert Rhee, Jae-Sung Cho, Donald Baril, Luke Marone, Margaret Hseih, Kristian Feterik, Roy Smith, Geetha Jeyabalan, Jennifer Rogers

**University of Utah Medical Center:** Russel Vinik – site PI, Dan Kinikini, Larry Kraiss, Michelle Mueller, Robert Pendleton, Matthew Rondina, Mark Sarfati, Nathan Wanner, Stacy Johnson, Christy Hopkins, Daniel Ihnat

**University of Virginia Health System:** John Angle – site PI, Alan Matsumoto, Nancy Harthun, Ulku Turba, Wael Saad, Brian Uthlaut, Srikant Nannapaneni, David Ling, Saher Sabri, John Kern, B. Gail Macik, George Hoke, Auh Wahn Park, James Stone, Benjamin Sneed, Scott Syverud, Kelly Davidson, Aditya Sharma, Ziv Haskal, Luke Wilkins

**Utah Valley Reginal Medical Center:** Carl Black – site PI, Mark Asay, Daniel Hatch, Robert Smilanich, Craig Patten, S. Douglas Brown, Ryan Nielsen, William Alward, John Collins, Matthew Nokes

**Wake Forest Baptist Health:** Randolph Geary – site PI, Matthew Edwards, Christopher Godshall, Pavel Levy

**Weill Cornell Medical College:** Ronald Winokur – site PI, Akhilesh Sista – previous site PI, David Madoff, Kyungmouk Lee, Bradley Pua, Maria DeSancho, Raffaele Milizia, Jing Gao

**Western Penn Allegheny Health System:** Swapna Goday – site PI, Margaret Kennedy – previous site PI, Robert Kaplan, Thomas Campbell, Gordon McLean, Jamie Hartman, Elmer Nahum, Sanualah Khalid

**Washington University in St. Louis:** Suresh Vedantham – site PI, Larry Lewis, Nael Saad, Mark Thoelke, Robert Pallow, Seth Klein, Gregorio Sicard

**Table S1: Binary Study Outcomes by Treatment Group (Per-Protocol Analysis)**

| Outcome                                                                  | PCDT<br>n = 190 |         | No PCDT<br>n = 191 |        | Risk Ratio |            | P<br>Value |
|--------------------------------------------------------------------------|-----------------|---------|--------------------|--------|------------|------------|------------|
|                                                                          | Events          | (%)     | Events             | (%)    | Estimate   | 95% CI     |            |
| <b>PTS: <sup>(1)</sup></b>                                               |                 |         |                    |        |            |            |            |
| Ulcer (any assessment)                                                   | 9               | (4.7%)  | 12                 | (6.3%) |            |            |            |
| Villalta $\geq$ 5 (without ulcer)                                        | 82              | (43%)   | 87                 | (46%)  |            |            |            |
| Late endovascular procedure only                                         | 1               | (0.5%)  | 0                  | (0%)   |            |            |            |
| <b>Total</b>                                                             | 92              | (48%)   | 99                 | (52%)  | 0.92*      | 0.76, 1.12 | 0.43       |
| <b>PTS: VCSS <math>\geq</math> 4 <sup>(1)</sup></b>                      | 56              | (29%)   | 78                 | (41%)  | 0.71*      | 0.54, 0.94 | 0.015      |
| <b>PTS incidence proportion: <sup>(2)</sup></b>                          |                 |         |                    |        |            |            |            |
| At 6 months                                                              | 48/165          | (29%)   | 68/147             | (46%)  | 0.63       | 0.47, 0.84 |            |
| At 12 months                                                             | 56/152          | (37%)   | 49/135             | (36%)  | 1.02       | 0.75, 1.38 |            |
| At 18 months                                                             | 42/135          | (31%)   | 47/121             | (39%)  | 0.80       | 0.57, 1.12 |            |
| At 24 months                                                             | 46/142          | (32%)   | 51/129             | (40%)  | 0.82       | 0.60, 1.13 |            |
| <b>Moderate-severe PTS: Villalta <math>\geq</math> 10 <sup>(3)</sup></b> | 35              | (18%)   | 55                 | (29%)  | 0.63*      | 0.43, 0.91 | 0.013      |
| <b>Moderate-severe PTS incidence proportion: <sup>(4)</sup></b>          |                 |         |                    |        |            |            |            |
| At 6 months                                                              | 19/165          | (12%)   | 29/147             | (20%)  | 0.58       | 0.34, 1.00 |            |
| At 12 months                                                             | 18/152          | (12%)   | 24/135             | (18%)  | 0.67       | 0.38, 1.17 |            |
| At 18 months                                                             | 16/135          | (12%)   | 23/121             | (19%)  | 0.62       | 0.35, 1.12 |            |
| At 24 months                                                             | 16/142          | (11%)   | 25/129             | (19%)  | 0.58       | 0.33, 1.04 |            |
| <b>Severe PTS: Villalta <math>\geq</math> 15 <sup>(5)</sup></b>          | 17              | (8.9%)  | 30                 | (16%)  | 0.56*      | 0.32, 1.00 | 0.044      |
| <b>Severe PTS: VCSS <math>\geq</math> 8 <sup>(5)</sup></b>               | 13              | (6.8%)  | 28                 | (15%)  | 0.45*      | 0.24, 0.87 | 0.013      |
| <b>Major non-PTS treatment failure</b>                                   | 4               | (2.1%)  | 4                  | (2.1%) | 1.01       | 0.26, 3.96 | 0.99       |
| <b>Any treatment failures <sup>(6)</sup></b>                             | 93              | (49%)   | 102                | (53%)  | 0.91*      | 0.75, 1.10 | 0.34       |
| <b>Major bleeding in first 10 days</b>                                   | 3               | (1.6%)  | 1                  | (0.5%) | 2.02       | 0.37, 11.0 | 0.31       |
| <b>Any bleeding in first 10 days</b>                                     | 7               | (3.7%)  | 4                  | (2.1%) | 1.39       | 0.63, 3.06 | 0.35       |
| <b>VTE:</b>                                                              |                 |         |                    |        |            |            |            |
| First 30 days                                                            | 11              | (5.8%)  | 4                  | (2.1%) | 2.76       | 0.90, 8.53 | 0.064      |
| Total over 24 months                                                     | 26              | (13.7%) | 16                 | (8.4%) | 1.63       | 0.91, 2.95 | 0.10       |
| <b>Death</b>                                                             | 6               | (3.2%)  | 6                  | (3.1%) | 1.01       | 0.33, 3.06 | 0.99       |

\*Cochran-Mantel-Haenszel (CMH) test adjusted for center

<sup>(1)</sup> Cumulative proportion of patients who developed PTS (ulcer, Villalta  $\geq$  5 or LEP) at any time between 6 and 24 months inclusive; <sup>(2)</sup> At each visit, the proportion of patients with any PTS according to the Villalta scale among those who had an assessment performed (denominator); <sup>(3)</sup> Cumulative proportion with moderate or severe PTS (pre-specified analysis); <sup>(4)</sup> At each visit, the proportion of patients with any moderate or severe PTS according to the Villalta scale among those who had an assessment performed (denominator); <sup>(5)</sup> Cumulative proportion with severe PTS; <sup>(6)</sup> Composite of PTS or major non-PTS treatment failure. Villalta scores (0-33 range) – higher is worse; VCSS scores (0-27 range) – higher is worse.

PP, Per protocol analysis set; PTS, post-thrombotic syndrome; CI, confidence interval; VTE, venous thromboembolism

**Table S2: Continuous Study Outcomes by Treatment Group (Per-Protocol Analysis)**

| Outcome                                                                    | PCDT<br>n = 196 |              | No PCDT<br>n = 195 |              | PCDT – No PCDT<br>Difference |         |
|----------------------------------------------------------------------------|-----------------|--------------|--------------------|--------------|------------------------------|---------|
|                                                                            | n               | mean (SE)    | n                  | mean (SE)    | Estimate (SE)                | P-value |
| <b>Villalta mean scores*:</b> <sup>(1)</sup>                               |                 |              |                    |              |                              |         |
| At 6 months                                                                | 165             | 3.72 (0.52)  | 147                | 5.39 (0.51)  | -1.67 (0.48)                 | <0.001  |
| At 12 months                                                               | 152             | 3.78 (0.51)  | 135                | 5.47 (0.50)  | -1.69 (0.46)                 | <0.001  |
| At 18 months                                                               | 135             | 3.84 (0.52)  | 121                | 5.56 (0.51)  | -1.72 (0.49)                 | <0.001  |
| At 24 months                                                               | 142             | 3.90 (0.55)  | 129                | 5.64 (0.54)  | -1.75 (0.55)                 | 0.0016  |
| <b>VCSS mean scores<sup>†‡</sup>:</b> <sup>(2)</sup>                       |                 |              |                    |              |                              |         |
| At 6 months                                                                | 164             | 1.82 (0.33)  | 144                | 3.02 (0.32)  | -1.20 (0.28)                 | <0.001  |
| At 12 months                                                               | 148             | †            | 133                | †            | †                            | †       |
| At 18 months                                                               | 131             | 1.68 (0.35)  | 119                | 3.47 (0.35)  | -1.79 (0.34)                 | <0.001  |
| At 24 months                                                               | 129             | 1.99 (0.35)  | 120                | 2.84 (0.36)  | -0.85 (0.35)                 | 0.015   |
| <b>SF-36 general Quality of Life<sup>‡</sup>:</b> <sup>(3)</sup>           |                 |              |                    |              |                              |         |
| <b>PCS:</b> Change, baseline to 24 months                                  | 138             | 10.51 (0.95) | 126                | 11.45 (0.99) | -0.94 (1.18)                 | 0.42    |
| <b>MCS:</b> Change, baseline to 24 months                                  | 138             | 2.85 (0.82)  | 126                | 3.96 (0.87)  | -1.11 (1.10)                 | 0.31    |
| <b>VEINES disease-specific Quality of Life<sup>‡</sup>:</b> <sup>(4)</sup> |                 |              |                    |              |                              |         |
| <b>Overall:</b> Change, baseline to 24 months                              | 138             | 28.43 (1.98) | 126                | 23.13 (2.08) | 5.30 (2.57)                  | 0.040   |
| <b>Symptoms:</b> Change, baseline to 24 months                             | 137             | 21.31 (1.98) | 126                | 16.23 (2.08) | 5.08 (2.58)                  | 0.012   |
| <b>Leg pain severity<sup>§</sup></b> (7-point scale): <sup>(5)</sup>       |                 |              |                    |              |                              |         |
| Change, baseline to Day 10                                                 | 178             | -1.79 (0.14) | 173                | -1.25 (0.14) | -0.54 (0.20)                 | 0.0062  |
| Change, baseline to Day 30                                                 | 176             | -2.39 (0.15) | 168                | -1.79 (0.15) | -0.61 (0.21)                 | 0.0047  |
| <b>Index leg circumference<sup>§</sup></b> (cm): <sup>(6)</sup>            |                 |              |                    |              |                              |         |
| Change, baseline to Day 10                                                 | 172             | -0.81 (0.23) | 173                | 0.25 (0.23)  | -1.06 (0.32)                 | 0.0012  |
| Change, baseline to Day 30                                                 | 172             | -1.39 (0.23) | 167                | -0.05 (0.23) | -1.35 (0.32)                 | <0.001  |

\* Mean scores, standard errors (SE) and treatment differences estimated using growth curve models and piece-wise linear regression adjusted for center, and baseline covariates (age, sex, BMI, race)

† Model estimates are unchanged from month 6 to month 12 due to the lack of a significant time trend

‡ Mean scores, standard errors (SE) and treatment differences estimated using growth curve models and piece-wise linear regression adjusted for center, and baseline covariates (age, sex, BMI, race, Villalta score)

§ Mean change scores, SEs, and treatment differences estimated using multiple linear regression adjusted for center

<sup>(1)</sup> Villalta scores (0-33 range) – higher is worse; <sup>(2)</sup> VCSS scores (0-27 range) – higher is worse; <sup>(3)</sup> SF-36 major scales: physical component score (PCS, 0-100 range) and mental component score (MCS, 0-100 range) – higher is better, with a difference of 3 to 4 points considered clinically meaningful; <sup>(4)</sup> VEINES overall score (0-100 range) and symptom specific score (0-100 range) – higher is better; <sup>(5)</sup> patient-reported severity of pain in the index leg (0-7 range) – higher is worse; <sup>(6)</sup> leg circumference measured at 10cm below tibial tuberosity of the index leg.

## **Details of Growth Curve Modelling of the Villalta Scores**

The repeated Villalta scores over time (i.e. at baseline, 1, 6, 12, 18, 24 months) were analyzed with growth curve mixed models using piecewise-linear regression.

The models take into account the correlation between the repeated observations, and they include both fixed effects: the pre-specified baseline factors (treatment, center, sex, and race), and continuous covariates (age at randomization, body mass index); and random effects (actual visit dates, patient). The full model includes all piece-wise time components, interaction terms (treatment x piece-wise time components), and the baseline factors.

Autoregressive and unstructured covariance matrix structures were tried to model the correlation between the repeated observations. Random effects are fit first, then the fixed effects. The best fitting model was determined by comparing Bayesian information criteria between candidate models. The least squares mean estimates were obtained from the best-fit model. All of the modelling was performed using SAS 9.4.
